# Supplementary material for: Transfer of Stress Resilient QTLs and Panicle Traits into the Rice Variety, Reeta through Classical and Marker-Assisted Breeding Approaches
Source: MDPI journal article supplement (doi:10.3390/ijms241310708), 2023-06-27
Supplement: s1 [file s1]

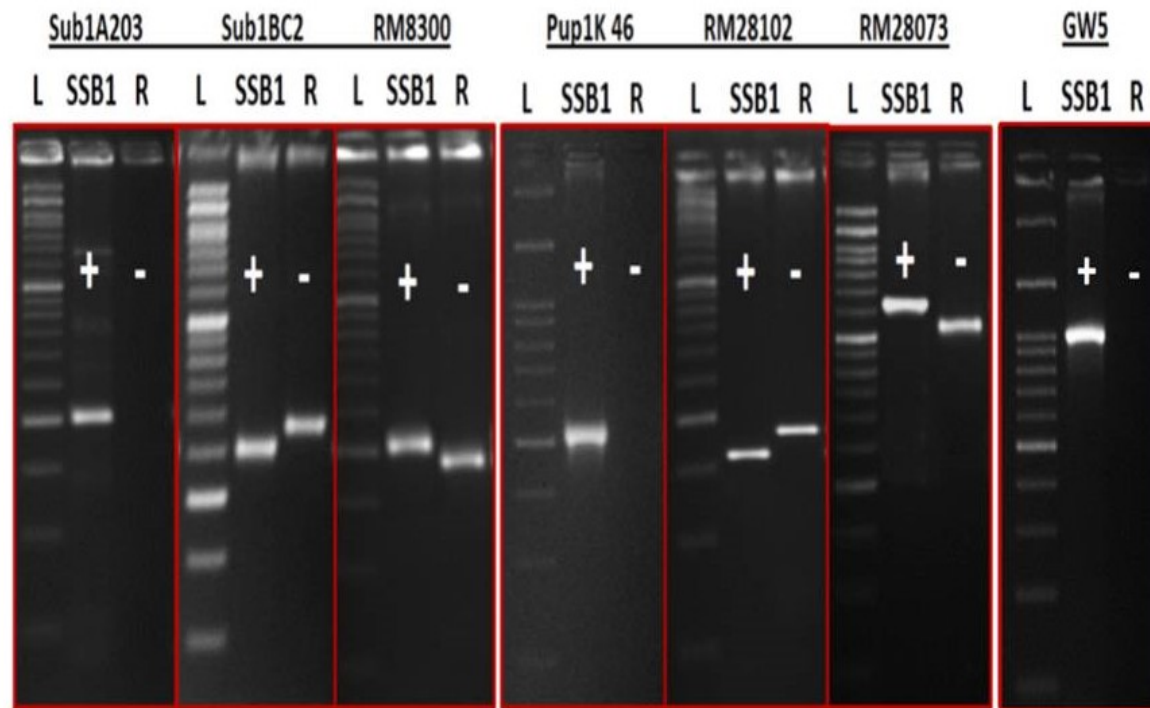

**Supplementary Figure S1.** PCR amplification of *Sub1*, *Pup1*, and *GW5* by deploying markers, Sub1-A203 and Sub1-BC2 for submergence tolerance; Pup1K46, RM28102 & RM28073 for low phosphorus tolerance and *GW5* for grain weight. L: Molecular weight marker (50 bp plus ladder); SSB1: Swarna-Sub1 and R: Reeta.

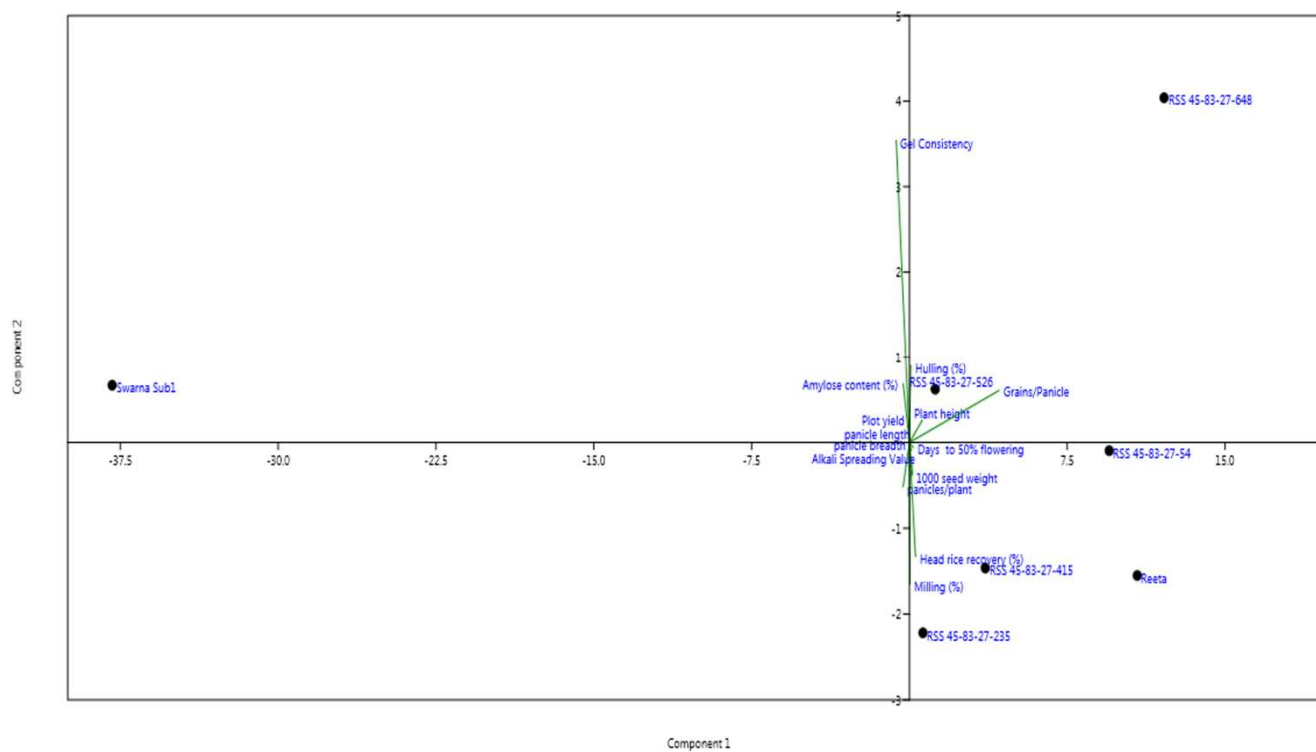

**Supplementary Figure S2.** Genotype-trait biplot diagram of 5 pyramided lines carrying *Sub1*, *Pup1* and *GW5* (narrow-grain) alleles along with the parents (Reeta and Swarna-Sub1) for the 14 morpho-quality traits plotted in the first two principal components.

**Supplementary Table S1.** Molecular markers were used for screening of submergence, low phosphorus stress tolerance, and yield component QTLs for the foreground selection.

| Sl. No. | Trait name               | QTL         | Ch. No | Position (bp) | Primer Name | Primer sequence                                                          | Reference                    |
|---------|--------------------------|-------------|--------|---------------|-------------|--------------------------------------------------------------------------|------------------------------|
| 1       | Submergence tolerance    | <i>Sub1</i> | 9      | 180           | RM8300      | (F)5'-GCTAGTGCAGGGTTGACACA-3'<br>(R) 5'-CTCTGGCCGTTTCATGGTAT-3'          | <a href="#">[6, 9, 17]</a>   |
|         |                          |             |        | 200           | Sub1A203    | (F)5'-CTTCTTGCTCAACGACAACG-3'<br>(R) 5'-AGGCTCCAGATGTCCATGTC-3'          |                              |
|         |                          |             |        | 250           | Sub1BC2     | (F)5'-AAAACAATGGTTCCATACGAGAC-3'<br>(R) 5'-GCCTATCAATGCGTGCTCTT-3'       |                              |
| 2       | Low Phosphorus tolerance | <i>Pup1</i> | 12     | 523           | Pup1K46     | (F)5'-TGAGATAGCCGTCAAGATGCT-3'<br>(R) 5'-AAGGACCACCATTCCATAGC-3'         | <a href="#">[20, 21, 25]</a> |
|         |                          |             |        | 168           | RM28102     | (F)5'-CACTAATTCTTCGGCTCCACTTTAGG-3'<br>(R) 5'-GTGGAAGCTCCGAGAAAGTGC-3'   |                              |
|         |                          |             |        | 656           | RM28073     | (F)5'-GTGTTGGTGGTGATGAAGCAAGG-3'<br>(R) 5'-GGACGAAGGATGTATGTGTCTGTACC-3' |                              |
| 3       | Grain weight             | <i>GW5</i>  | 5      | 1050          | GW5         | (F)5'-GCGTCGTCAGAGGTAGA-3'<br>(R) 5'-GACCTAACCCATCTCATTCCA-3'            | <a href="#">[9, 26]</a>      |

**Supplementary Table S2.** Polymorphic SSR markers obtained between the rice varieties, Reeta and Swarna-Sub1

| <b>Chrom #</b> | <b>No. of markers tested</b> | <b>No. of polymorphic markers</b> | <b>Name of polymorphic markers</b>                                                                                                                                                                                |
|----------------|------------------------------|-----------------------------------|-------------------------------------------------------------------------------------------------------------------------------------------------------------------------------------------------------------------|
| 1              | 85                           | 23                                | RM1003, RM10346, RM10694, RM11239, RM403, RM1349, RM212, RM220, RM297, RM5, RM6703, RM522, RM488, RM493, RM495, RM11701, RM237, RM488, RM11701, RM237, RM10793, RM24, RM312                                       |
| 2              | 68                           | 28                                | RM233, RM154, RM106, RM1335, RM13439, RM211, RM263, RM341, RM6247, RM240, RM5699, RM322, RM327, RM3421, RM423, RM452, RM5897, RM492, RM6374, RM6378, RM53, RM561, RM5631, RM6318, RM6378, RM6641, RM7575, RM12808 |
| 3              | 69                           | 19                                | RM1278, RM14723, RM175, RM293, RM251, RM520, RM3392, RM517, RM3686, RM564, RM85, RM5626, RM168, RM570, RM571, RM218, RM3329, RM2334, RM232                                                                        |
| 4              | 50                           | 16                                | RM3735, RM5586, RM5687, RM518, RM401, RM471, RM261, RM3648, RM5424, RM3423, RM5749, RM16770, RM16686, RM1113, RM127, RM8213                                                                                       |
| 5              | 56                           | 8                                 | RM18452, RM18451, RM200, RM7452, RM1089, RM592, RM440, RM574                                                                                                                                                      |
| 6              | 57                           | 11                                | RM19367, RM225, RM439, RM314, RM204, RM585, RM510, RM469, RM589, RM400, RM20377                                                                                                                                   |
| 7              | 66                           | 9                                 | RM5436, RM10, RM432, RM1209, RM3753, RM11, RM5793, RM1132, RM336                                                                                                                                                  |
| 8              | 48                           | 17                                | RM407, RM544, RM72, RM5485, RM256, RM22590, RM483, RM22585, RM22565, RM342, RM8271, RM6356, RM152, RM310, RM547, RM44, RM339                                                                                      |
| 9              | 44                           | 8                                 | RM566, RM107, RM3808, RM245, RM242, RM205, RM219, RM434                                                                                                                                                           |
| 10             | 41                           | 9                                 | RM311, RM179, RM271, RM6100, RM216, RM25181, RM258, RM590, RM222                                                                                                                                                  |
| 11             | 64                           | 5                                 | RM202, RM536, RM209, RM4112, RM1233                                                                                                                                                                               |
| 12             | 85                           | 15                                | RM5746, RM6947, RM519, RM235, RM415, RM20A, RM1246, RM17, RM1103, RM28759, RM3331, RM511, RM1261, RM28438, RM28073                                                                                                |
| Total          | 728                          | 168                               |                                                                                                                                                                                                                   |
